# Supplementary material
Source: Royal Society of Chemistry journal article supplement (doi:10.1039/d6mh00330c)
Supplement: d6mh00330c1.pdf [file d6mh00330c1.pdf]

### Supplementary data

| Gene          | Species | Sequence (5'-3')                                                 |
|---------------|---------|------------------------------------------------------------------|
| <i>GAPDH</i>  | Human   | Fw: GTC AGT GGT GGA CCT GAC CT<br>Rv: TGC TGT AGC CAA ATT CGT TG |
| <i>ADAMTS</i> | Human   | Fw: CCT CTG TCT GTG TGC AAG GA<br>Rv: GTG GCT CCA GTT GGA ATT GT |
| <i>G-CSF</i>  | Human   | Fw: GCT TGA GCC AAC TCC ATA GC<br>Rv: TTC CCA GTT CTT CCA TCT GC |
| <i>SLIT3</i>  | Human   | Fw: CTT GTC TCC CTG TCC ACC AT<br>Rv: CTG GAT GGG AAT CTC CTT GA |
| <i>MMP9</i>   | Human   | Fw: TTG ACA GCG ACA AGA AGT GG<br>Rv: GCC ATT CAC GTC GTC CTT AT |
| <i>PDGF</i>   | Human   | Fw: CTT TAA GAA GGC CAC GGT GA<br>Rv: CTA GGC TCC AAG GGT CTC CT |
| <i>RUNX2</i>  | Human   | Fw: GCA GTT CCC AAG CAT TTC AT<br>Rv: CAC TCT GGC TTT GGG AAG AG |
| <i>OSX</i>    | Human   | Fw: TAA TGG GCT CCT TTC ACC TG<br>Rv: CAC TGG GCA GAC AGT CAG AA |
| <i>OCN</i>    | Human   | Fw: GTG CAG AGT CCA GCA AAG GT<br>Rv: TCA GCC AAC TCG TCA CAG TC |
| <i>OPN</i>    | Human   | Fw: TGA AAC GAG TCA GCT GGA TG<br>Rv: TGA AAT TCA TGG CTG TGG AA |
| <i>Col1a</i>  | Human   | Fw: GTG CTA AAG GTG CCA ATG GT<br>Rv: CTC CTC GCT TTC CTT CCT CT |

**Table S1.** List of primers for RT-qPCR.

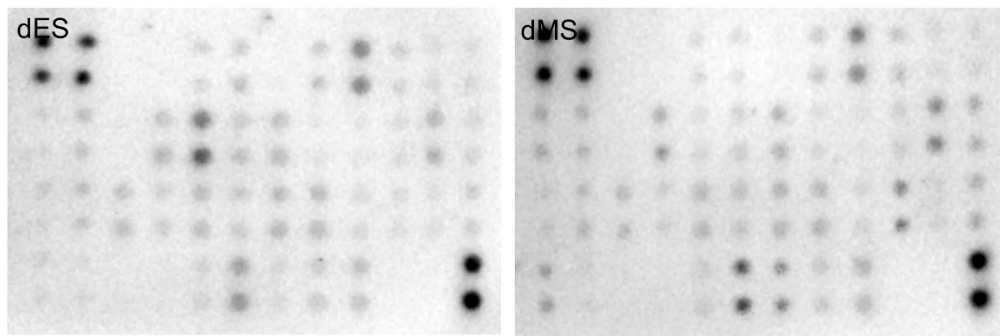

|   | A            | B         | C          | D          | E          | F           | G          | H       | I       | J       | K     | L           |
|---|--------------|-----------|------------|------------|------------|-------------|------------|---------|---------|---------|-------|-------------|
| 1 | POS          | POS       | NEG        | NEG        | AR         | bFGF        | beta-NGF   | EGF     | EGFR    | FGF-4   | FGF-6 | FGF-7 (KGF) |
| 2 |              |           |            |            |            |             |            |         |         |         |       |             |
| 3 | GCSF         | GDNF      | GM-CSF     | HB-EGF     | HGF        | IGFBP-1     | IGFBP-2    | IGFBP-3 | IGFBP-4 | IGFBP-6 | IGF-1 | IGF-1R      |
| 4 |              |           |            |            |            |             |            |         |         |         |       |             |
| 5 | IGF-2        | M-CSF     | M-CSFR     | NT-3       | NT-4       | PDGFR alpha | PDGFR beta | PDGF-AA | PDGF-AB | PDGF-BB | PLGF  | SCF         |
| 6 |              |           |            |            |            |             |            |         |         |         |       |             |
| 7 | SCFR (CD117) | TGF alpha | TGF beta 1 | TGF beta 2 | TGF beta 3 | VEGF-A      | VEGFR2     | VEGFR3  | VEGF-D  | BLANK   | BLANK | POS         |
| 8 |              |           |            |            |            |             |            |         |         |         |       |             |

**Supplementary Figure S1.** The whole images of the growth factor array of the decellularized scaffolds (upper), and the position information of each type of growth factor on the growth factor array sheet (lower).

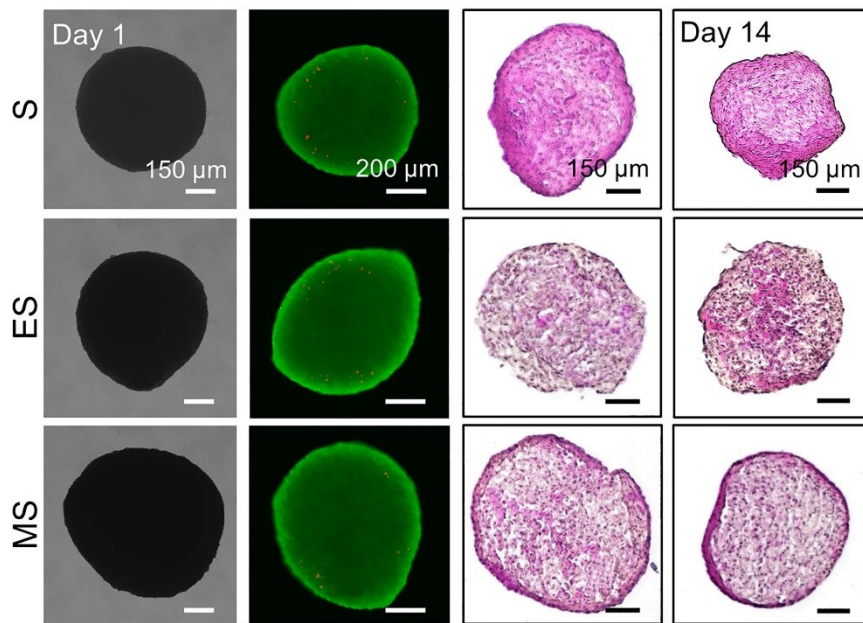

**Supplementary Figure S2.** Phase contrast images and live/dead staining of sectioned engineered spheroids on day 1, and H&E staining images on day 1 and 14.

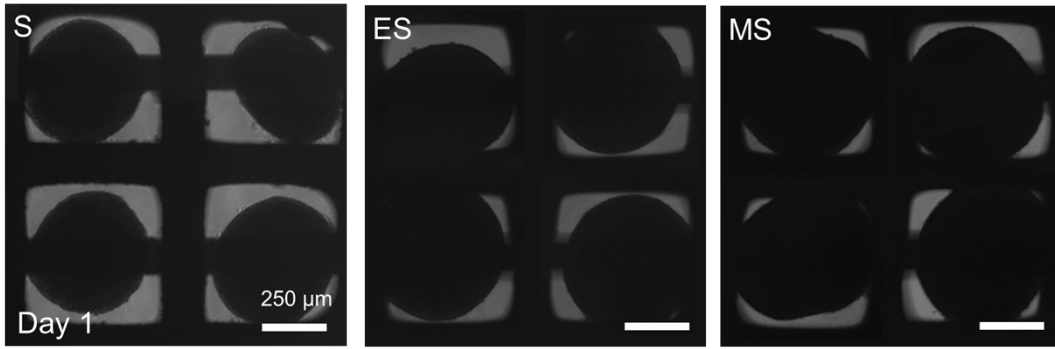

**Supplementary Figure S3.** Phase contrast images of the engineered spheroids-laden scaffold on day 1.

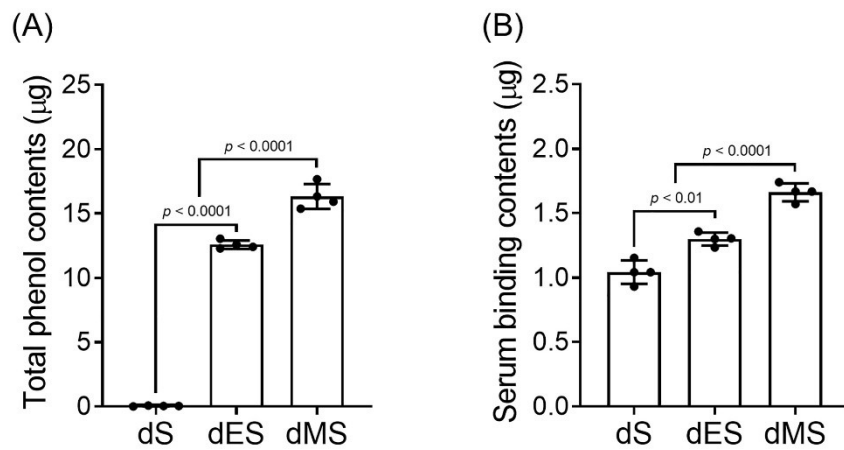

**Supplementary Figure S4.** Additional functions of the decellularized spheroids-laden scaffolds. (A) Total phenol quantification of the decellularized scaffolds by Folin-Ciocalteu assay. (B) The amount of serum binding to the decellularized scaffolds by immersing them to the FBS-contained solution in 37°C, 24 hr, and analyzed indirectly by measuring the remained serum in the solution through micro-BCA assay.

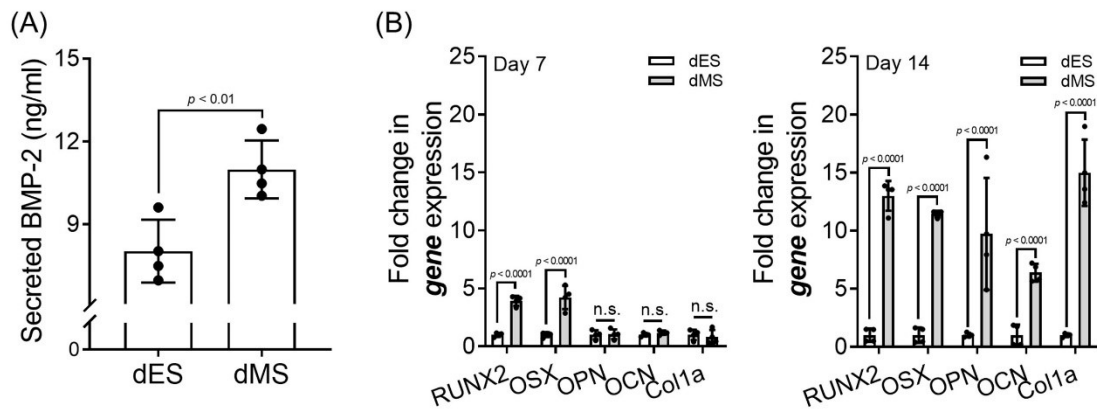

**Supplementary Figure S5.** Additional *in vitro* osteogenic effect analysis of the decellularized scaffold. (A) Released amount of BMP-2 from the hADSCs seeded on the decellularized scaffolds. (B) RT-qPCR of the osteogenic gene markers through day 7 (left) and 14 (right).

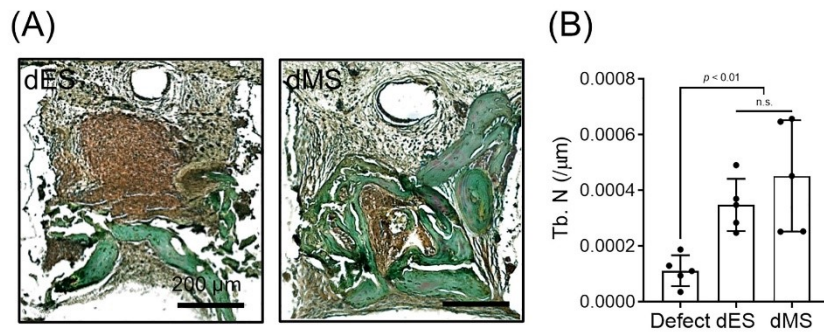

**Supplementary Figure S6.** (A) Magnified images of the Goldner's trichrome staining of the groups. (B) Analysis of newly regenerated trabecular number of the groups from Micro-CT analysis.

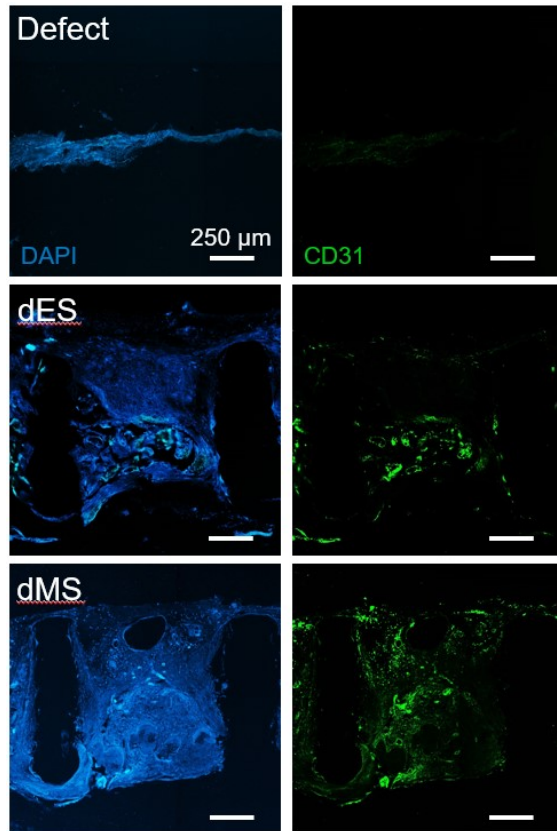

**Supplementary Figure S7.** IF staining images for CD31 of the groups with vertically sectioned samples.

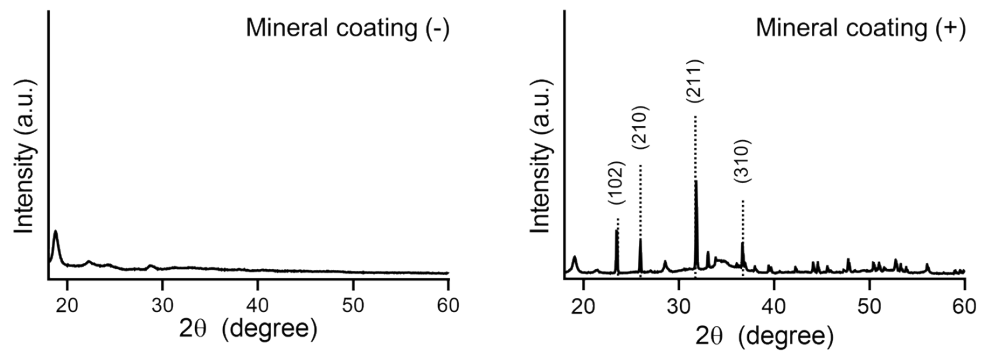

**Supplementary Figure S8.** XRD analysis of the non-mineral coated fibers and mineral coated fibers.

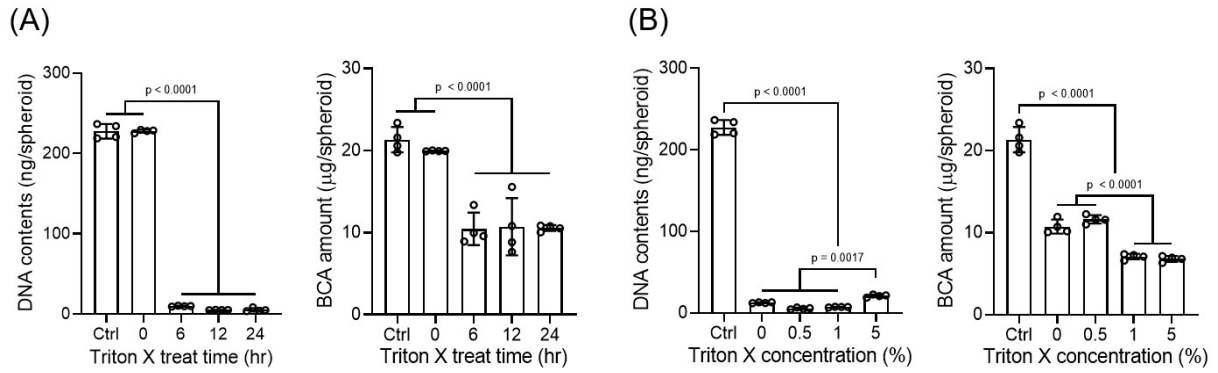

**Supplementary Figure S9.** Optimization of decellularization condition for the engineered spheroids. (A) DNA assay and BCA assay of the decellularized spheroids with different Triton X-100 treat times. (B) DNA assay and BCA assay of the decellularized spheroids with different Triton X-100 concentrations.

Cell seeding on the surface

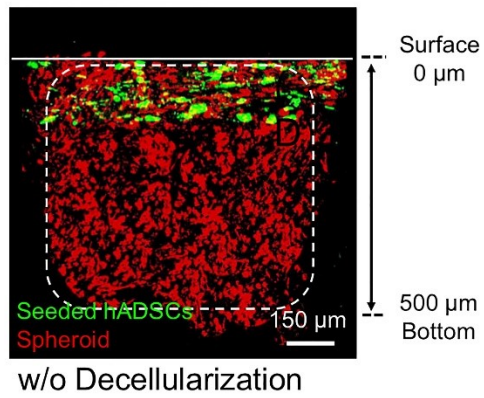

**Supplementary Figure S10.** The vertically sectioned images of cell seeded on the non-decellularized scaffolds; spheroid or decellularized spheroid (Red), newly seeded cells (Green).
